# Supplementary material for: LKB1 dictates sensitivity to immunotherapy through Skp2-mediated ubiquitination of PD-L1 protein in non-small cell lung cancer
Source: PubMed Central journal article supplement — J Immunother Cancer. 2024 Dec 18;12(12):e009444. doi: 10.1136/jitc-2024-009444 (PMC11660338; doi:10.1136/jitc-2024-009444), 2024-12-18
Supplement: jitc-12-12-s001.pdf [file jitc-12-12-s001.pdf]

**Supplementary Table S1. Antibody sources for Western blot, IP, IF and IHC.**

| <b>Antibody for</b> | <b>Brand &amp; Catalog No.</b>      | <b>Dilution</b> |
|---------------------|-------------------------------------|-----------------|
| <b>Western blot</b> |                                     |                 |
| $\beta$ -actin      | #66009-1-Ig, Proteintech            | 1/5000          |
| GAPDH               | #60004-1-Ig, Proteintech            | 1/5000          |
| Human LKB1          | #3050, Cell Signaling<br>Technology | 1/1000          |
| Mouse LKB1          | #10746-1-AP, Proteintech            | 1/1000          |
| Skp2                | #2652, Cell Signaling<br>Technology | 1/1000          |
| p-AMPK              | #2535, Cell Signaling<br>Technology | 1/1000          |
| AMPK                | #5831, Cell Signaling<br>Technology | 1/1000          |
| Human PD-L1         | #ab205921, Abcam                    | 1/1000          |
| Mouse PD-L1         | #66248-1-Ig, Proteintech            | 1/1000          |

|                        |                                     |                 |
|------------------------|-------------------------------------|-----------------|
| Myc tag                | #A02060, Abbkine                    | 1/2000          |
| Flag tag               | #A02010, Abbkine                    | 1/2000          |
| His tag                | #A02050, Abbkine                    | 1/2000          |
| HA tag                 | #A02040, Abbkine                    | 1/2000          |
| Ub                     | #MAB701, R&D                        | 1/1000          |
| HRP-Rabbit IgG         | #7074, Cell Signaling<br>Technology | 1/2000          |
| HRP-Mouse IgG          | #7076, Cell Signaling<br>Technology | 1/2000          |
|                        |                                     |                 |
| <b>Antibody for IP</b> | <b>Brand &amp; Catalog No.</b>      | <b>Dilution</b> |
| Myc tag                | #A02060, Abbkine                    | 1/500           |
| Flag tag               | #F3165, Sigma                       | 1/500           |
| HA tag                 | #A02040, Abbkine                    | 1/500           |
| LKB1                   | #3050, Cell Signaling<br>Technology | 1/100           |

|                         |                                      |                 |
|-------------------------|--------------------------------------|-----------------|
| Skp2                    | #2652, Cell Signaling<br>Technology  | 1/50            |
| PD-L1                   | #ab237726, Abcam                     | 1/30            |
|                         |                                      |                 |
| <b>Antibody for IHC</b> | <b>Brand &amp; Catalog No.</b>       | <b>Dilution</b> |
| LKB1                    | #10746-1-AP, Proteintech             | 1/200           |
| Skp2                    | # ab183039, Abcam                    | 1/50            |
| Human PD-L1             | #ab237726, Abcam                     | 1/100           |
| Mouse PD-L1             | #66248-1-Ig, Proteintech             | 1/300           |
| Human CD8               | #ab245118, Abcam                     | 1/100           |
| Mouse CD8               | #98941, Cell Signaling<br>Technology | 1/200           |
| Granzyme B              | #ab255598, Abcam                     | 1/2000          |
| Ki67                    | #ab15580, Abcam                      | 1/300           |

**Supplementary Table S2. Enrichment analysis *LKB1* co-mutant genes.**

**Event:** Indicates whether gene1 and gene2 are co-mutated or mutually exclusive.

**pValue:** The *P*-value indicating the probability of this event.

**oddsRatio:** The odds ratio supporting this event.

**00:** The number of samples where neither of the two genes is mutated.

**11:** The number of samples where both genes are mutated.

**01:** The number of samples where gene1 is not mutated, but gene2 is mutated.

**10:** The number of samples where gene2 is not mutated, but gene1 is mutated.

**event\_ratio:** Co-mutated samples / mutually exclusive samples for the two genes.

| Gene1 | Gene 2 | pValue      | oddsRatio   | 00  | 11 | 01 | 10 | Event              | Gene pair   | event_ratio |
|-------|--------|-------------|-------------|-----|----|----|----|--------------------|-------------|-------------|
| BRAF  | KRAS   | 0.000688313 | 0           | 97  | 0  | 83 | 13 | Mutually_Exclusive | BRAF, KRAS  | 0/96        |
| TP53  | KRAS   | 0.000706995 | 0.356738755 | 36  | 35 | 48 | 74 | Mutually_Exclusive | KRAS, TP53  | 35/122      |
| FLT1  | TLR4   | 0.000970009 | 11.48029144 | 170 | 5  | 12 | 6  | Co_Occurence       | FLT1, TLR4  | 5/18        |
| MUC16 | TP53   | 0.001119085 | 2.970755931 | 67  | 47 | 62 | 17 | Co_Occurence       | MUC16, TP53 | 47/79       |
| RET   | ZFH3   | 0.001147328 | 10.74572154 | 170 | 5  | 7  | 11 | Co_Occurence       | RET, ZFH3   | 5/18        |

|        |        |             |             |     |    |    |    |                    |                |       |
|--------|--------|-------------|-------------|-----|----|----|----|--------------------|----------------|-------|
| CUX1   | ATR    | 0.001305241 | 10.22288165 | 170 | 5  | 9  | 9  | Co_Occurence       | ATR, CUX1      | 5/18  |
| MUC16  | RBM10  | 0.00205786  | 4.047898504 | 120 | 15 | 9  | 49 | Co_Occurence       | MUC16, RBM10   | 15/58 |
| KMT2C  | BRIP1  | 0.002232273 | 9.070471296 | 167 | 5  | 6  | 15 | Co_Occurence       | BRIP1, KMT2C   | 5/21  |
| ARID2  | FGFR3  | 0.00228572  | 12.0424247  | 174 | 4  | 7  | 8  | Co_Occurence       | ARID2, FGFR3   | 4/15  |
| TLR4   | CREBBP | 0.002417262 | 8.557221856 | 168 | 5  | 8  | 12 | Co_Occurence       | CREBBP, TLR4   | 5/20  |
| CUX1   | RET    | 0.002618145 | 8.301570062 | 168 | 5  | 11 | 9  | Co_Occurence       | CUX1, RET      | 5/20  |
| FAT1   | KRAS   | 0.00264191  | 0.136159399 | 93  | 2  | 81 | 17 | Mutually_Exclusive | FAT1, KRAS     | 2/98  |
| FLT1   | KRAS   | 0.002737654 | 0           | 99  | 0  | 83 | 11 | Mutually_Exclusive | FLT1, KRAS     | 0/94  |
| TLR4   | NAV3   | 0.002790574 | 5.701793445 | 157 | 7  | 19 | 10 | Co_Occurence       | NAV3, TLR4     | 7/29  |
| GRIN2A | CREBBP | 0.003201321 | 10.67660567 | 173 | 4  | 9  | 7  | Co_Occurence       | CREBBP, GRIN2A | 4/16  |
| RB1    | ATR    | 0.003555598 | 7.577081961 | 167 | 5  | 9  | 12 | Co_Occurence       | ATR, RB1       | 5/21  |
| GNAS   | FLT1   | 0.003580687 | 7.928823769 | 165 | 5  | 6  | 17 | Co_Occurence       | FLT1, GNAS     | 5/23  |
| TSHZ3  | KMT2D  | 0.00471881  | 6.962775578 | 166 | 5  | 13 | 9  | Co_Occurence       | KMT2D, TSHZ3   | 5/22  |
| TSHZ3  | NTRK3  | 0.00471881  | 6.962775578 | 166 | 5  | 13 | 9  | Co_Occurence       | NTRK3, TSHZ3   | 5/22  |
| NF1    | KRAS   | 0.004769093 | 0.14619267  | 94  | 2  | 81 | 16 | Mutually_Exclusive | KRAS, NF1      | 2/97  |
| FLT1   | PTPRT  | 0.005744366 | 8.676366235 | 171 | 4  | 11 | 7  | Co_Occurence       | FLT1, PTPRT    | 4/18  |

|        |        |             |             |     |    |    |    |                    |               |        |
|--------|--------|-------------|-------------|-----|----|----|----|--------------------|---------------|--------|
| GNAS   | TLR4   | 0.005944145 | 5.376851456 | 160 | 6  | 11 | 16 | Co_Occurence       | GNAS, TLR4    | 6/27   |
| MUC16  | GRIN2A | 0.006919396 | 5.938487492 | 126 | 8  | 3  | 56 | Co_Occurence       | GRIN2A, MUC16 | 8/59   |
| RET    | GRIN2A | 0.007424408 | 7.921622161 | 170 | 4  | 7  | 12 | Co_Occurence       | GRIN2A, RET   | 4/19   |
| ARID1A | MGA    | 0.007424408 | 7.921622161 | 170 | 4  | 7  | 12 | Co_Occurence       | ARID1A, MGA   | 4/19   |
| APC    | MUC16  | 0.008281195 | 3.989379627 | 122 | 12 | 52 | 7  | Co_Occurence       | APC, MUC16    | 12/59  |
| RB1    | TP53   | 0.008543571 | 6.492710816 | 82  | 15 | 94 | 2  | Co_Occurence       | RB1, TP53     | 15/96  |
| RB1    | KRAS   | 0.008550557 | 0.157561175 | 95  | 2  | 81 | 15 | Mutually_Exclusive | KRAS, RB1     | 2/96   |
| TSHZ3  | CREBBP | 0.008620579 | 7.401090166 | 170 | 4  | 9  | 10 | Co_Occurence       | CREBBP, TSHZ3 | 4/19   |
| NAV3   | TP53   | 0.009726072 | 3.747457559 | 79  | 21 | 88 | 5  | Co_Occurence       | NAV3, TP53    | 21/93  |
| ARID1A | LRRK2  | 0.010562947 | 6.907062905 | 169 | 4  | 8  | 12 | Co_Occurence       | ARID1A, LRRK2 | 4/20   |
| MUC16  | KDR    | 0.010921563 | 5.06567048  | 125 | 9  | 4  | 55 | Co_Occurence       | KDR, MUC16    | 9/59   |
| MUC16  | SETBP1 | 0.010921563 | 5.06567048  | 125 | 9  | 4  | 55 | Co_Occurence       | MUC16, SETBP1 | 9/59   |
| MUC16  | KMT2C  | 0.011054597 | 3.464759795 | 121 | 12 | 8  | 52 | Co_Occurence       | KMT2C, MUC16  | 12/60  |
| KEAP1  | TP53   | 0.01107906  | 0.457312863 | 43  | 33 | 76 | 41 | Mutually_Exclusive | KEAP1, TP53   | 33/117 |
| SETBP1 | POLQ   | 0.011295562 | 6.700601092 | 169 | 4  | 11 | 9  | Co_Occurence       | POLQ, SETBP1  | 4/20   |
| NTRK3  | FLT1   | 0.011725997 | 6.730922879 | 168 | 4  | 7  | 14 | Co_Occurence       | FLT1, NTRK3   | 4/21   |

|        |        |             |             |     |    |    |    |              |               |       |
|--------|--------|-------------|-------------|-----|----|----|----|--------------|---------------|-------|
| KMT2D  | GRIN2A | 0.011725997 | 6.730922879 | 168 | 4  | 7  | 14 | Co_Occurence | GRIN2A, KMT2D | 4/21  |
| RET    | FAT1   | 0.011743682 | 5.216902144 | 163 | 5  | 14 | 11 | Co_Occurence | FAT1, RET     | 5/25  |
| RET    | MUC16  | 0.012986147 | 3.767110327 | 123 | 10 | 54 | 6  | Co_Occurence | MUC16, RET    | 10/60 |
| TP53   | FAT1   | 0.013292832 | 4.613813522 | 81  | 16 | 3  | 93 | Co_Occurence | FAT1, TP53    | 16/96 |
| ARID1A | KDR    | 0.014470227 | 6.115513577 | 168 | 4  | 9  | 12 | Co_Occurence | ARID1A, KDR   | 4/21  |
| BACH2  | TP53   | 0.014727621 | 5.512612502 | 82  | 13 | 96 | 2  | Co_Occurence | BACH2, TP53   | 13/98 |
| NAV3   | GNAS   | 0.015054021 | 3.698060666 | 152 | 7  | 15 | 19 | Co_Occurence | GNAS, NAV3    | 7/34  |
| TSHZ3  | PTPRT  | 0.015062831 | 6.005765524 | 168 | 4  | 11 | 10 | Co_Occurence | PTPRT, TSHZ3  | 4/21  |
| KMT2D  | MUC16  | 0.01544021  | 3.590621828 | 122 | 11 | 53 | 7  | Co_Occurence | KMT2D, MUC16  | 11/60 |
| CUX1   | MUC16  | 0.016313276 | 4.025372494 | 124 | 9  | 55 | 5  | Co_Occurence | CUX1, MUC16   | 9/60  |
| BACH2  | GNAS   | 0.016930871 | 4.675419237 | 161 | 5  | 17 | 10 | Co_Occurence | BACH2, GNAS   | 5/27  |
| RELN   | MUC16  | 0.017091938 | 3.013726996 | 119 | 13 | 51 | 10 | Co_Occurence | MUC16, RELN   | 13/61 |
| GLI1   | PTPRD  | 0.017270065 | 4.845445014 | 158 | 5  | 23 | 7  | Co_Occurence | GLI1, PTPRD   | 5/30  |
| GRIN2A | FGFR3  | 0.017822325 | 7.968507182 | 174 | 3  | 8  | 8  | Co_Occurence | FGFR3, GRIN2A | 3/16  |
| GRIN2A | FLT1   | 0.017822325 | 7.968507182 | 174 | 3  | 8  | 8  | Co_Occurence | FLT1, GRIN2A  | 3/16  |
| PIK3CG | MGA    | 0.017822325 | 7.968507182 | 174 | 3  | 8  | 8  | Co_Occurence | MGA, PIK3CG   | 3/16  |

|        |       |             |             |     |    |    |    |              |               |       |
|--------|-------|-------------|-------------|-----|----|----|----|--------------|---------------|-------|
| ATR    | RBM10 | 0.018099265 | 4.620572704 | 160 | 5  | 19 | 9  | Co_Occurence | ATR, RBM10    | 5/28  |
| CREBBP | RB1   | 0.018178832 | 5.619112679 | 167 | 4  | 13 | 9  | Co_Occurence | CREBBP, RB1   | 4/22  |
| SETBP1 | TLR4  | 0.018178832 | 5.619112679 | 167 | 4  | 13 | 9  | Co_Occurence | SETBP1, TLR4  | 4/22  |
| RET    | ATR   | 0.01921106  | 5.480350865 | 167 | 4  | 10 | 12 | Co_Occurence | ATR, RET      | 4/22  |
| NAV3   | KMT2D | 0.020002178 | 3.836351784 | 155 | 6  | 12 | 20 | Co_Occurence | KMT2D, NAV3   | 6/32  |
| KMT2D  | FAT1  | 0.020190248 | 4.370300505 | 161 | 5  | 14 | 13 | Co_Occurence | FAT1, KMT2D   | 5/27  |
| CREBBP | KMT2D | 0.022451855 | 5.192815127 | 166 | 4  | 14 | 9  | Co_Occurence | CREBBP, KMT2D | 4/23  |
| PIK3CA | KMT2D | 0.022451855 | 5.192815127 | 166 | 4  | 14 | 9  | Co_Occurence | KMT2D, PIK3CA | 4/23  |
| SETBP1 | KMT2D | 0.022451855 | 5.192815127 | 166 | 4  | 14 | 9  | Co_Occurence | KMT2D, SETBP1 | 4/23  |
| KDR    | NF1   | 0.022451855 | 5.192815127 | 166 | 4  | 14 | 9  | Co_Occurence | KDR, NF1      | 4/23  |
| CREBBP | NTRK3 | 0.022451855 | 5.192815127 | 166 | 4  | 14 | 9  | Co_Occurence | CREBBP, NTRK3 | 4/23  |
| KMT2D  | TP53  | 0.022563881 | 4.280597078 | 81  | 15 | 94 | 3  | Co_Occurence | KMT2D, TP53   | 15/97 |
| EPPK1  | GLI1  | 0.023001193 | 7.058733377 | 173 | 3  | 9  | 8  | Co_Occurence | EPPK1, GLI1   | 3/17  |
| GRIN2A | LRRK2 | 0.023001193 | 7.058733377 | 173 | 3  | 9  | 8  | Co_Occurence | GRIN2A, LRRK2 | 3/17  |
| RB1    | TSHZ3 | 0.024028125 | 5.034690925 | 166 | 4  | 10 | 13 | Co_Occurence | RB1, TSHZ3    | 4/23  |
| PTPRT  | RBM10 | 0.024830676 | 4.137921608 | 159 | 5  | 19 | 10 | Co_Occurence | PTPRT, RBM10  | 5/29  |

|        |        |             |             |     |    |    |    |                    |              |        |
|--------|--------|-------------|-------------|-----|----|----|----|--------------------|--------------|--------|
| BACH2  | RET    | 0.024840348 | 4.959538148 | 166 | 4  | 12 | 11 | Co_Occurence       | BACH2, RET   | 4/23   |
| BRIP1  | TP53   | 0.024874062 | 8.317799507 | 83  | 10 | 99 | 1  | Co_Occurence       | BRIP1, TP53  | 10/100 |
| FLT1   | TP53   | 0.024874062 | 8.317799507 | 83  | 10 | 99 | 1  | Co_Occurence       | FLT1, TP53   | 10/100 |
| PTPRD  | KDR    | 0.025185445 | 4.219390286 | 157 | 5  | 8  | 23 | Co_Occurence       | KDR, PTPRD   | 5/31   |
| NTRK3  | ATM    | 0.02531295  | 4.057416858 | 160 | 5  | 15 | 13 | Co_Occurence       | ATM, NTRK3   | 5/28   |
| NF1    | KMT2C  | 0.02531295  | 4.057416858 | 160 | 5  | 15 | 13 | Co_Occurence       | KMT2C, NF1   | 5/28   |
| MET    | KRAS   | 0.02624258  | 0.203009389 | 98  | 2  | 81 | 12 | Mutually_Exclusive | KRAS, MET    | 2/93   |
| APC    | KDR    | 0.027315776 | 4.82280825  | 165 | 4  | 9  | 15 | Co_Occurence       | APC, KDR     | 4/24   |
| PAK5   | EPPK1  | 0.028941155 | 6.330001852 | 172 | 3  | 8  | 10 | Co_Occurence       | EPPK1, PAK5  | 3/18   |
| CREBBP | FLT1   | 0.028941155 | 6.330001852 | 172 | 3  | 8  | 10 | Co_Occurence       | CREBBP, FLT1 | 3/18   |
| SETBP1 | FLT1   | 0.028941155 | 6.330001852 | 172 | 3  | 8  | 10 | Co_Occurence       | FLT1, SETBP1 | 3/18   |
| BRAF   | GRIN2A | 0.028941155 | 6.330001852 | 172 | 3  | 8  | 10 | Co_Occurence       | BRAF, GRIN2A | 3/18   |
| PAK5   | MGA    | 0.028941155 | 6.330001852 | 172 | 3  | 8  | 10 | Co_Occurence       | MGA, PAK5    | 3/18   |
| FGFR3  | RELN   | 0.028972868 | 4.837657668 | 163 | 4  | 19 | 7  | Co_Occurence       | FGFR3, RELN  | 4/26   |
| GRIN2A | RELN   | 0.028972868 | 4.837657668 | 163 | 4  | 19 | 7  | Co_Occurence       | GRIN2A, RELN | 4/26   |
| MGA    | RELN   | 0.028972868 | 4.837657668 | 163 | 4  | 19 | 7  | Co_Occurence       | MGA, RELN    | 4/26   |

|        |        |             |             |     |   |    |    |              |               |      |
|--------|--------|-------------|-------------|-----|---|----|----|--------------|---------------|------|
| KMT2D  | CUX1   | 0.029545073 | 4.65251295  | 165 | 4 | 10 | 14 | Co_Occurence | CUX1, KMT2D   | 4/24 |
| RET    | ARID1A | 0.031402579 | 4.524726408 | 165 | 4 | 12 | 12 | Co_Occurence | ARID1A, RET   | 4/24 |
| ATM    | CREBBP | 0.032792928 | 4.498408408 | 164 | 4 | 9  | 16 | Co_Occurence | ATM, CREBBP   | 4/25 |
| RET    | CDKN2A | 0.03303007  | 3.742380839 | 158 | 5 | 19 | 11 | Co_Occurence | CDKN2A, RET   | 5/30 |
| PAK5   | MUC16  | 0.033164921 | 3.517056614 | 124 | 8 | 56 | 5  | Co_Occurence | MUC16, PAK5   | 8/61 |
| CDKN2A | FLT1   | 0.033676349 | 4.571237836 | 162 | 4 | 7  | 20 | Co_Occurence | CDKN2A, FLT1  | 4/27 |
| RBM10  | MGA    | 0.033676349 | 4.571237836 | 162 | 4 | 7  | 20 | Co_Occurence | MGA, RBM10    | 4/27 |
| NAV3   | PTPRT  | 0.034898477 | 3.701681868 | 157 | 5 | 10 | 21 | Co_Occurence | NAV3, PTPRT   | 5/31 |
| ATR    | FGFR3  | 0.035649112 | 5.73175199  | 171 | 3 | 8  | 11 | Co_Occurence | ATR, FGFR3    | 3/19 |
| MET    | FGFR3  | 0.035649112 | 5.73175199  | 171 | 3 | 8  | 11 | Co_Occurence | FGFR3, MET    | 3/19 |
| TSHZ3  | FGFR3  | 0.035649112 | 5.73175199  | 171 | 3 | 8  | 11 | Co_Occurence | FGFR3, TSHZ3  | 3/19 |
| CUX1   | GRIN2A | 0.035649112 | 5.73175199  | 171 | 3 | 8  | 11 | Co_Occurence | CUX1, GRIN2A  | 3/19 |
| CUX1   | MGA    | 0.035649112 | 5.73175199  | 171 | 3 | 8  | 11 | Co_Occurence | CUX1, MGA     | 3/19 |
| MET    | MGA    | 0.035649112 | 5.73175199  | 171 | 3 | 8  | 11 | Co_Occurence | MET, MGA      | 3/19 |
| TSHZ3  | MGA    | 0.035649112 | 5.73175199  | 171 | 3 | 8  | 11 | Co_Occurence | MGA, TSHZ3    | 3/19 |
| TSHZ3  | PIK3CG | 0.035649112 | 5.73175199  | 171 | 3 | 8  | 11 | Co_Occurence | PIK3CG, TSHZ3 | 3/19 |

|        |         |             |             |     |    |    |    |                    |               |       |
|--------|---------|-------------|-------------|-----|----|----|----|--------------------|---------------|-------|
| CUX1   | FAT1    | 0.035787105 | 4.320446481 | 164 | 4  | 15 | 10 | Co_Occurence       | CUX1, FAT1    | 4/25  |
| PIK3CA | ZFH3    | 0.037049674 | 5.605788359 | 171 | 3  | 9  | 10 | Co_Occurence       | PIK3CA, ZFH3  | 3/19  |
| POLQ   | NF1     | 0.037866725 | 4.209455235 | 164 | 4  | 14 | 11 | Co_Occurence       | NF1, POLQ     | 4/25  |
| BRAF   | SMARCA4 | 0.038705703 | 3.666985701 | 154 | 5  | 26 | 8  | Co_Occurence       | BRAF, SMARCA4 | 5/34  |
| KDR    | SMARCA4 | 0.038705703 | 3.666985701 | 154 | 5  | 26 | 8  | Co_Occurence       | KDR, SMARCA4  | 5/34  |
| RET    | RB1     | 0.038931606 | 4.15606774  | 164 | 4  | 13 | 12 | Co_Occurence       | RB1, RET      | 4/25  |
| LRRK2  | RELN    | 0.03995627  | 4.214089542 | 162 | 4  | 19 | 8  | Co_Occurence       | LRRK2, RELN   | 4/27  |
| KRAS   | PTPRD   | 0.040775709 | 0.392130417 | 89  | 7  | 21 | 76 | Mutually_Exclusive | KRAS, PTPRD   | 7/97  |
| GNAS   | TP53    | 0.041246401 | 2.905007931 | 79  | 17 | 92 | 5  | Co_Occurence       | GNAS, TP53    | 17/97 |
| CDKN2A | EGFR    | 0.042789048 | 3.412117779 | 157 | 5  | 12 | 19 | Co_Occurence       | CDKN2A, EGFR  | 5/31  |
| CDKN2A | TLR4    | 0.042789048 | 3.412117779 | 157 | 5  | 12 | 19 | Co_Occurence       | CDKN2A, TLR4  | 5/31  |
| POLQ   | BRIP1   | 0.043125298 | 5.23089262  | 170 | 3  | 8  | 12 | Co_Occurence       | BRIP1, POLQ   | 3/20  |
| BACH2  | FLT1    | 0.043125298 | 5.23089262  | 170 | 3  | 8  | 12 | Co_Occurence       | BACH2, FLT1   | 3/20  |
| PTPRT  | MGA     | 0.043125298 | 5.23089262  | 170 | 3  | 8  | 12 | Co_Occurence       | MGA, PTPRT    | 3/20  |
| MUC16  | FGFR3   | 0.043545913 | 3.807844536 | 125 | 7  | 4  | 57 | Co_Occurence       | FGFR3, MUC16  | 7/61  |
| MUC16  | FLT1    | 0.043545913 | 3.807844536 | 125 | 7  | 4  | 57 | Co_Occurence       | FLT1, MUC16   | 7/61  |

|        |         |             |             |     |    |    |    |                    |                |        |
|--------|---------|-------------|-------------|-----|----|----|----|--------------------|----------------|--------|
| MUC16  | PIK3CG  | 0.043545913 | 3.807844536 | 125 | 7  | 4  | 57 | Co_Occurence       | MUC16, PIK3CG  | 7/61   |
| CUX1   | GLI1    | 0.045453049 | 5.074832119 | 170 | 3  | 9  | 11 | Co_Occurence       | CUX1, GLI1     | 3/20   |
| ATR    | LRRK2   | 0.045453049 | 5.074832119 | 170 | 3  | 9  | 11 | Co_Occurence       | ATR, LRRK2     | 3/20   |
| ATR    | ZFH3    | 0.045453049 | 5.074832119 | 170 | 3  | 9  | 11 | Co_Occurence       | ATR, ZFH3      | 3/20   |
| NTRK3  | RELN    | 0.045635061 | 3.32475966  | 157 | 5  | 18 | 13 | Co_Occurence       | NTRK3, RELN    | 5/31   |
| GLI1   | CDKN2A  | 0.046236192 | 3.981647599 | 161 | 4  | 20 | 8  | Co_Occurence       | CDKN2A, GLI1   | 4/28   |
| SETBP1 | BRAF    | 0.046242316 | 5.024286541 | 170 | 3  | 10 | 10 | Co_Occurence       | BRAF, SETBP1   | 3/20   |
| PAK5   | CREBBP  | 0.046242316 | 5.024286541 | 170 | 3  | 10 | 10 | Co_Occurence       | CREBBP, PAK5   | 3/20   |
| SETBP1 | CREBBP  | 0.046242316 | 5.024286541 | 170 | 3  | 10 | 10 | Co_Occurence       | CREBBP, SETBP1 | 3/20   |
| PAK5   | KDR     | 0.046242316 | 5.024286541 | 170 | 3  | 10 | 10 | Co_Occurence       | KDR, PAK5      | 3/20   |
| MUC16  | KRAS    | 0.046513478 | 0.529491218 | 67  | 21 | 62 | 43 | Mutually_Exclusive | KRAS, MUC16    | 21/105 |
| RET    | FLT1    | 0.051363966 | 4.806460192 | 169 | 3  | 8  | 13 | Co_Occurence       | FLT1, RET      | 3/21   |
| BRAF   | RELN    | 0.053063534 | 3.728114925 | 161 | 4  | 19 | 9  | Co_Occurence       | BRAF, RELN     | 4/28   |
| PAK5   | RELN    | 0.053063534 | 3.728114925 | 161 | 4  | 19 | 9  | Co_Occurence       | PAK5, RELN     | 4/28   |
| ATR    | SMARCA4 | 0.053260888 | 3.242087596 | 153 | 5  | 26 | 9  | Co_Occurence       | ATR, SMARCA4   | 5/35   |
| MET    | SMARCA4 | 0.053260888 | 3.242087596 | 153 | 5  | 26 | 9  | Co_Occurence       | MET, SMARCA4   | 5/35   |

|        |        |             |             |     |    |    |    |                    |               |       |
|--------|--------|-------------|-------------|-----|----|----|----|--------------------|---------------|-------|
| BRIP1  | KEAP1  | 0.053670733 | 0.150362595 | 109 | 1  | 73 | 10 | Mutually_Exclusive | BRIP1, KEAP1  | 1/83  |
| KMT2D  | CDKN2A | 0.054173101 | 3.132011468 | 156 | 5  | 19 | 13 | Co_Occurence       | CDKN2A, KMT2D | 5/32  |
| KMT2C  | POLQ   | 0.054340659 | 3.644347249 | 162 | 4  | 11 | 16 | Co_Occurence       | KMT2C, POLQ   | 4/27  |
| ATM    | PTPRT  | 0.054340659 | 3.644347249 | 162 | 4  | 11 | 16 | Co_Occurence       | ATM, PTPRT    | 4/27  |
| KMT2C  | PTPRT  | 0.054340659 | 3.644347249 | 162 | 4  | 11 | 16 | Co_Occurence       | KMT2C, PTPRT  | 4/27  |
| LRRK2  | BACH2  | 0.05476405  | 4.630623372 | 169 | 3  | 12 | 9  | Co_Occurence       | BACH2, LRRK2  | 3/21  |
| LRRK2  | PTPRT  | 0.05476405  | 4.630623372 | 169 | 3  | 12 | 9  | Co_Occurence       | LRRK2, PTPRT  | 3/21  |
| APC    | RELN   | 0.056891334 | 3.070411702 | 156 | 5  | 18 | 14 | Co_Occurence       | APC, RELN     | 5/32  |
| PTPRD  | MGA    | 0.057066836 | 3.724933753 | 158 | 4  | 7  | 24 | Co_Occurence       | MGA, PTPRD    | 4/31  |
| RB1    | KMT2D  | 0.058313266 | 3.525449332 | 162 | 4  | 14 | 13 | Co_Occurence       | KMT2D, RB1    | 4/27  |
| TLR4   | KMT2D  | 0.058313266 | 3.525449332 | 162 | 4  | 14 | 13 | Co_Occurence       | KMT2D, TLR4   | 4/27  |
| TLR4   | NTRK3  | 0.058313266 | 3.525449332 | 162 | 4  | 14 | 13 | Co_Occurence       | NTRK3, TLR4   | 4/27  |
| FLT1   | EGFR   | 0.06035402  | 4.441957835 | 168 | 3  | 14 | 8  | Co_Occurence       | EGFR, FLT1    | 3/22  |
| GRIN2A | RB1    | 0.06035402  | 4.441957835 | 168 | 3  | 14 | 8  | Co_Occurence       | GRIN2A, RB1   | 3/22  |
| GRIN2A | TLR4   | 0.06035402  | 4.441957835 | 168 | 3  | 14 | 8  | Co_Occurence       | GRIN2A, TLR4  | 3/22  |
| NF1    | MUC16  | 0.062272562 | 2.78442092  | 121 | 10 | 54 | 8  | Co_Occurence       | MUC16, NF1    | 10/62 |

|        |        |             |             |     |    |    |    |              |               |        |
|--------|--------|-------------|-------------|-----|----|----|----|--------------|---------------|--------|
| TP53   | POLQ   | 0.062557493 | 3.321698229 | 81  | 12 | 3  | 97 | Co_Occurence | POLQ, TP53    | 12/100 |
| ARID2  | ARID1A | 0.064964305 | 4.254369268 | 168 | 3  | 13 | 9  | Co_Occurence | ARID1A, ARID2 | 3/22   |
| ZFH3   | ARID1A | 0.064964305 | 4.254369268 | 168 | 3  | 13 | 9  | Co_Occurence | ARID1A, ZFH3  | 3/22   |
| LRRK2  | RET    | 0.064964305 | 4.254369268 | 168 | 3  | 13 | 9  | Co_Occurence | LRRK2, RET    | 3/22   |
| CDKN2A | FAT1   | 0.067220619 | 2.891827955 | 155 | 5  | 14 | 19 | Co_Occurence | CDKN2A, FAT1  | 5/33   |
| RET    | ATM    | 0.067499908 | 3.323754597 | 161 | 4  | 16 | 12 | Co_Occurence | ATM, RET      | 4/28   |
| BRAF   | BACH2  | 0.067804597 | 4.149258771 | 168 | 3  | 12 | 10 | Co_Occurence | BACH2, BRAF   | 3/22   |
| KDR    | BACH2  | 0.067804597 | 4.149258771 | 168 | 3  | 12 | 10 | Co_Occurence | BACH2, KDR    | 3/22   |
| RELN   | ATR    | 0.06830437  | 3.33769667  | 160 | 4  | 10 | 19 | Co_Occurence | ATR, RELN     | 4/29   |
| RELN   | MET    | 0.06830437  | 3.33769667  | 160 | 4  | 10 | 19 | Co_Occurence | MET, RELN     | 4/29   |
| TLR4   | FAT1   | 0.069709701 | 3.273109617 | 161 | 4  | 15 | 13 | Co_Occurence | FAT1, TLR4    | 4/28   |
| EPPK1  | KMT2D  | 0.070079625 | 4.125552485 | 167 | 3  | 15 | 8  | Co_Occurence | EPPK1, KMT2D  | 3/23   |
| FLT1   | KMT2D  | 0.070079625 | 4.125552485 | 167 | 3  | 15 | 8  | Co_Occurence | FLT1, KMT2D   | 3/23   |
| FGFR3  | NF1    | 0.070079625 | 4.125552485 | 167 | 3  | 15 | 8  | Co_Occurence | FGFR3, NF1    | 3/23   |
| GRIN2A | NTRK3  | 0.070079625 | 4.125552485 | 167 | 3  | 15 | 8  | Co_Occurence | GRIN2A, NTRK3 | 3/23   |
| MGA    | NTRK3  | 0.070079625 | 4.125552485 | 167 | 3  | 15 | 8  | Co_Occurence | MGA, NTRK3    | 3/23   |

|         |        |             |             |     |    |    |    |                    |                |        |
|---------|--------|-------------|-------------|-----|----|----|----|--------------------|----------------|--------|
| NTRK3   | NF1    | 0.070454355 | 3.2565703   | 161 | 4  | 14 | 14 | Co_Occurence       | NF1, NTRK3     | 4/28   |
| ARID2   | TP53   | 0.071094776 | 4.115873569 | 82  | 10 | 99 | 2  | Co_Occurence       | ARID2, TP53    | 10/101 |
| NAV3    | MUC16  | 0.071572545 | 2.263990454 | 116 | 13 | 51 | 13 | Co_Occurence       | MUC16, NAV3    | 13/64  |
| GLI1    | KRAS   | 0.072678029 | 0.248418764 | 100 | 2  | 81 | 10 | Mutually_Exclusive | GLI1, KRAS     | 2/91   |
| KEAP1   | EGFR   | 0.073096587 | 0.318517776 | 105 | 3  | 14 | 71 | Mutually_Exclusive | EGFR, KEAP1    | 3/85   |
| CDKN2A  | KEAP1  | 0.073233286 | 0.383105612 | 100 | 5  | 69 | 19 | Mutually_Exclusive | CDKN2A, KEAP1  | 5/88   |
| GLI1    | EGFR   | 0.076028988 | 3.931356703 | 167 | 3  | 14 | 9  | Co_Occurence       | EGFR, GLI1     | 3/23   |
| ARID2   | RB1    | 0.076028988 | 3.931356703 | 167 | 3  | 14 | 9  | Co_Occurence       | ARID2, RB1     | 3/23   |
| LRRK2   | RB1    | 0.076028988 | 3.931356703 | 167 | 3  | 14 | 9  | Co_Occurence       | LRRK2, RB1     | 3/23   |
| CDKN2A  | KRAS   | 0.077137977 | 0.400009448 | 92  | 6  | 77 | 18 | Mutually_Exclusive | CDKN2A, KRAS   | 6/95   |
| RELN    | TP53   | 0.078145449 | 2.392015368 | 78  | 17 | 92 | 6  | Co_Occurence       | RELN, TP53     | 17/98  |
| CUX1    | CDKN2A | 0.078345391 | 3.153296568 | 159 | 4  | 20 | 10 | Co_Occurence       | CDKN2A, CUX1   | 4/30   |
| MET     | CDKN2A | 0.078345391 | 3.153296568 | 159 | 4  | 20 | 10 | Co_Occurence       | CDKN2A, MET    | 4/30   |
| CREBBP  | NAV3   | 0.07925177  | 3.165206351 | 158 | 4  | 22 | 9  | Co_Occurence       | CREBBP, NAV3   | 4/31   |
| PIK3CA  | NAV3   | 0.07925177  | 3.165206351 | 158 | 4  | 22 | 9  | Co_Occurence       | NAV3, PIK3CA   | 4/31   |
| SMARCA4 | EPPK1  | 0.079564913 | 3.252861976 | 155 | 4  | 7  | 27 | Co_Occurence       | EPPK1, SMARCA4 | 4/34   |

|        |         |             |             |     |   |    |    |                    |                |      |
|--------|---------|-------------|-------------|-----|---|----|----|--------------------|----------------|------|
| RET    | BRAF    | 0.080112528 | 3.811776861 | 167 | 3 | 10 | 13 | Co_Occurrence      | BRAF, RET      | 3/23 |
| ARID1A | PAK5    | 0.080112528 | 3.811776861 | 167 | 3 | 10 | 13 | Co_Occurrence      | ARID1A, PAK5   | 3/23 |
| RET    | PAK5    | 0.080112528 | 3.811776861 | 167 | 3 | 10 | 13 | Co_Occurrence      | PAK5, RET      | 3/23 |
| ARID1A | PIK3CA  | 0.080112528 | 3.811776861 | 167 | 3 | 10 | 13 | Co_Occurrence      | ARID1A, PIK3CA | 3/23 |
| KMT2D  | KRAS    | 0.080192318 | 0.348938493 | 96  | 4 | 79 | 14 | Mutually_Exclusive | KMT2D, KRAS    | 4/93 |
| MGA    | APC     | 0.080520757 | 3.848288536 | 166 | 3 | 16 | 8  | Co_Occurrence      | APC, MGA       | 3/24 |
| FGFR3  | FAT1    | 0.080520757 | 3.848288536 | 166 | 3 | 16 | 8  | Co_Occurrence      | FAT1, FGFR3    | 3/24 |
| FLT1   | FAT1    | 0.080520757 | 3.848288536 | 166 | 3 | 16 | 8  | Co_Occurrence      | FAT1, FLT1     | 3/24 |
| GRIN2A | FAT1    | 0.080520757 | 3.848288536 | 166 | 3 | 16 | 8  | Co_Occurrence      | FAT1, GRIN2A   | 3/24 |
| RBM10  | ATM     | 0.081942819 | 2.683467012 | 154 | 5 | 15 | 19 | Co_Occurrence      | ATM, RBM10     | 5/34 |
| KMT2C  | RB1     | 0.082231862 | 3.051599009 | 160 | 4 | 13 | 16 | Co_Occurrence      | KMT2C, RB1     | 4/29 |
| NTRK3  | SMARCA4 | 0.083540727 | 0           | 144 | 0 | 31 | 18 | Mutually_Exclusive | NTRK3, SMARCA4 | 0/49 |
| KMT2D  | APC     | 0.083858116 | 3.022783472 | 160 | 4 | 15 | 14 | Co_Occurrence      | APC, KMT2D     | 4/29 |
| BRAF   | KEAP1   | 0.084707369 | 2.74837454  | 114 | 8 | 66 | 5  | Co_Occurrence      | BRAF, KEAP1    | 8/71 |
| NAV3   | SMARCA4 | 0.085043744 | 0.183670873 | 137 | 1 | 30 | 25 | Mutually_Exclusive | NAV3, SMARCA4  | 1/55 |
| ARID2  | KMT2D   | 0.087927713 | 3.65016456  | 166 | 3 | 15 | 9  | Co_Occurrence      | ARID2, KMT2D   | 3/24 |

|       |         |             |             |     |    |    |    |                    |               |       |
|-------|---------|-------------|-------------|-----|----|----|----|--------------------|---------------|-------|
| GLI1  | KMT2D   | 0.087927713 | 3.65016456  | 166 | 3  | 15 | 9  | Co_Occurrence      | GLI1, KMT2D   | 3/24  |
| ZFH3  | KMT2D   | 0.087927713 | 3.65016456  | 166 | 3  | 15 | 9  | Co_Occurrence      | KMT2D, ZFH3   | 3/24  |
| ARID2 | NF1     | 0.087927713 | 3.65016456  | 166 | 3  | 15 | 9  | Co_Occurrence      | ARID2, NF1    | 3/24  |
| LRRK2 | NF1     | 0.087927713 | 3.65016456  | 166 | 3  | 15 | 9  | Co_Occurrence      | LRRK2, NF1    | 3/24  |
| LRRK2 | NTRK3   | 0.087927713 | 3.65016456  | 166 | 3  | 15 | 9  | Co_Occurrence      | LRRK2, NTRK3  | 3/24  |
| FAT1  | SMARCA4 | 0.090851736 | 2.732314763 | 149 | 6  | 25 | 13 | Co_Occurrence      | FAT1, SMARCA4 | 6/38  |
| KEAP1 | KMT2C   | 0.091075301 | 0.369545517 | 103 | 4  | 16 | 70 | Mutually_Exclusive | KEAP1, KMT2C  | 4/86  |
| EPPK1 | ATM     | 0.091653728 | 3.602471835 | 165 | 3  | 17 | 8  | Co_Occurrence      | ATM, EPPK1    | 3/25  |
| FLT1  | ATM     | 0.091653728 | 3.602471835 | 165 | 3  | 17 | 8  | Co_Occurrence      | ATM, FLT1     | 3/25  |
| FGFR3 | KMT2C   | 0.091653728 | 3.602471835 | 165 | 3  | 17 | 8  | Co_Occurrence      | FGFR3, KMT2C  | 3/25  |
| MUC16 | GNAS    | 0.092756586 | 2.216401185 | 118 | 11 | 11 | 53 | Co_Occurrence      | GNAS, MUC16   | 11/64 |
| RB1   | BRAF    | 0.093384035 | 3.521278029 | 166 | 3  | 10 | 14 | Co_Occurrence      | BRAF, RB1     | 3/24  |
| TLR4  | BRAF    | 0.093384035 | 3.521278029 | 166 | 3  | 10 | 14 | Co_Occurrence      | BRAF, TLR4    | 3/24  |
| TLR4  | PAK5    | 0.093384035 | 3.521278029 | 166 | 3  | 10 | 14 | Co_Occurrence      | PAK5, TLR4    | 3/24  |
| TLR4  | ROS1    | 0.093384035 | 3.521278029 | 166 | 3  | 10 | 14 | Co_Occurrence      | ROS1, TLR4    | 3/24  |
| RB1   | SETBP1  | 0.093384035 | 3.521278029 | 166 | 3  | 10 | 14 | Co_Occurrence      | RB1, SETBP1   | 3/24  |

|       |        |             |             |     |    |    |    |              |              |        |
|-------|--------|-------------|-------------|-----|----|----|----|--------------|--------------|--------|
| BACH2 | MUC16  | 0.094012673 | 2.476908576 | 122 | 8  | 56 | 7  | Co_Occurence | BACH2, MUC16 | 8/63   |
| ATR   | ARID1A | 0.09672202  | 3.448229568 | 166 | 3  | 13 | 11 | Co_Occurence | ARID1A, ATR  | 3/24   |
| KMT2C | TP53   | 0.096825    | 2.509959939 | 79  | 15 | 94 | 5  | Co_Occurence | KMT2C, TP53  | 15/99  |
| PTPRT | POLQ   | 0.097845171 | 3.424529438 | 166 | 3  | 12 | 12 | Co_Occurence | POLQ, PTPRT  | 3/24   |
| NTRK3 | KMT2C  | 0.098494408 | 2.818304928 | 159 | 4  | 16 | 14 | Co_Occurence | KMT2C, NTRK3 | 4/30   |
| MET   | TP53   | 0.098848254 | 3.014952026 | 81  | 11 | 98 | 3  | Co_Occurence | MET, TP53    | 11/101 |
| TSHZ3 | TP53   | 0.098848254 | 3.014952026 | 81  | 11 | 98 | 3  | Co_Occurence | TP53, TSHZ3  | 11/101 |

Supplementary Table S3. Enrichment analysis of CNVs in *LKB1* WT and *LKB1* mutant NSCLC.

| <i>LKB1</i> WT<br>(5809 samples) |        | <i>LKB1</i> mutant<br>(193 samples) |        |
|----------------------------------|--------|-------------------------------------|--------|
| Gene                             | Ratio  | Gene                                | Ratio  |
| TERC                             | 10.21% | MYC                                 | 17.10% |
| EGFR                             | 6.23%  | MCL1                                | 13.47% |
| MDM2                             | 5.70%  | TERC                                | 8.29%  |
| MYC                              | 5.47%  | LYN                                 | 4.66%  |
| MCL1                             | 5.04%  | RIT1                                | 3.63%  |
| SOX2                             | 4.36%  | MDM2                                | 3.11%  |
| TERT                             | 4.01%  | CCNE1                               | 3.11%  |
| CDK4                             | 3.89%  | GNAS                                | 3.11%  |
| RAC1                             | 2.91%  | KRAS                                | 3.11%  |
| BCL6                             | 2.51%  | RAC1                                | 2.59%  |
| PIK3CA                           | 2.39%  | EGFR                                | 2.59%  |
| PRKCI                            | 2.32%  | PAK1                                | 2.59%  |
| CCND1                            | 2.26%  | BCL9                                | 2.59%  |
| MAP3K13                          | 2.00%  | SOX2                                | 2.59%  |
| ETV5                             | 1.95%  | CRKL                                | 2.59%  |
| FGF4                             | 1.79%  | RICTOR                              | 2.07%  |
| FGF19                            | 1.76%  | MET                                 | 2.07%  |

|        |       |      |       |
|--------|-------|------|-------|
| FGF3   | 1.72% | FGF3 | 2.07% |
| RICTOR | 1.65% | FGF4 | 2.07% |
| FGFR1  | 1.62% | CDK4 | 2.07% |

**Supplementary Table S4. Analysis of TMB in *LKB1* WT and *LKB1* mutant NSCLC.**

| TMB                | $\geq 20$ Muts/Mb (%) | $< 20$ Muts/Mb (%) |
|--------------------|-----------------------|--------------------|
| <i>LKB1</i> mutant | 27 (14.59%)           | 158 (85.41%)       |
| <i>LKB1</i> WT     | 234 (4.14%)           | 5419 (95.86%)      |

**Supplementary Table S5. The usage of anti-PD-1/PD-L1 immunotherapy.**

| <b>Anti-PD-1/PD-L1 agents</b> | <b>Number of receipts</b> | <b>Lines of treatment</b>                              |
|-------------------------------|---------------------------|--------------------------------------------------------|
| <b>Sintilimab</b>             | 7                         | 6 patients in 1L<br>1 patient in 3L                    |
| <b>Camrelizumab</b>           | 10                        | 8 patients in 1L<br>1 patient in 2L<br>1 patient in 3L |
| <b>Pembrolizumab</b>          | 6                         | 5 patients in 1L<br>1 patient in 2L                    |
| <b>Durvalumab</b>             | 1                         | 1 patient in 1L                                        |
| <b>Tislelizumab</b>           | 13                        | 13 patients in 1L                                      |
| <b>Toripalimab</b>            | 3                         | 1 patient in 1L<br>2 patients in 2L                    |
