# Supplementary material for: LKB1 dictates sensitivity to immunotherapy through Skp2-mediated ubiquitination of PD-L1 protein in non-small cell lung cancer
Source: PubMed Central journal article supplement — J Immunother Cancer. 2024 Dec 18;12(12):e009444. doi: 10.1136/jitc-2024-009444 (PMC11660338; doi:10.1136/jitc-2024-009444), 2024-12-18
Supplement: jitc-12-12-s002.pdf [file jitc-12-12-s002.pdf]

## Figure S1

A

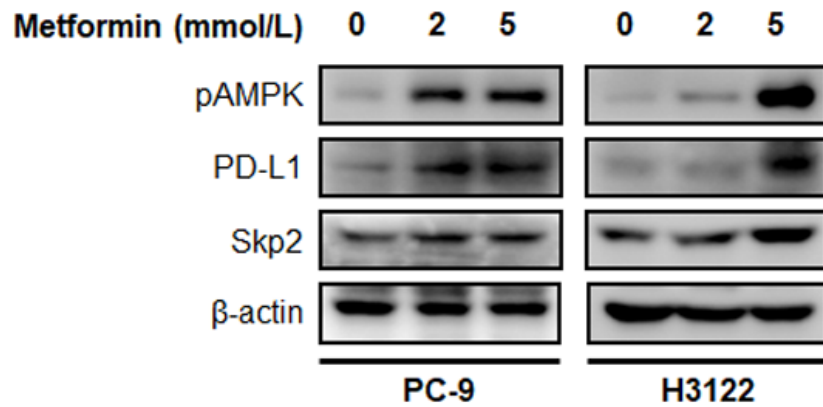

B

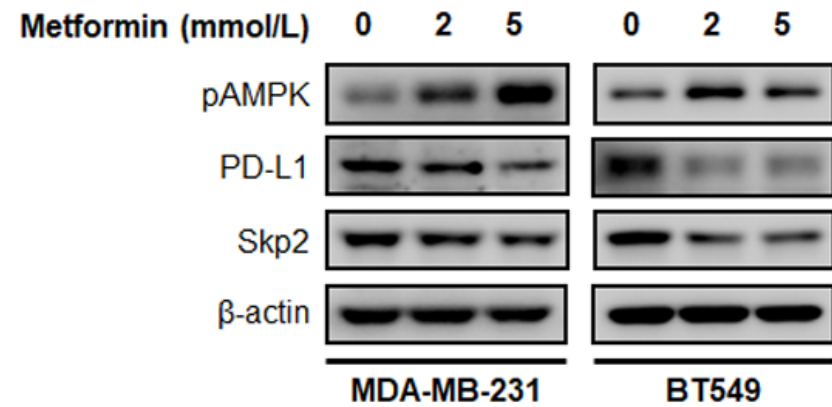

**Supplementary Figure S1. Effect of metformin treatment on PD-L1 in NSCLC and breast cancer.** (A) PC-9 and H3122 NSCLC cells were treated with increasing concentrations of metformin for 48 h. Expression of pAMPK, PD-L1 and Skp2 was determined by immunoblotting. (B) MDA-MB-231 and BT549 breast cancer cells were treated with metformin and analyzed for pAMPK, PD-L1 and Skp2 expression.

**Figure S2**

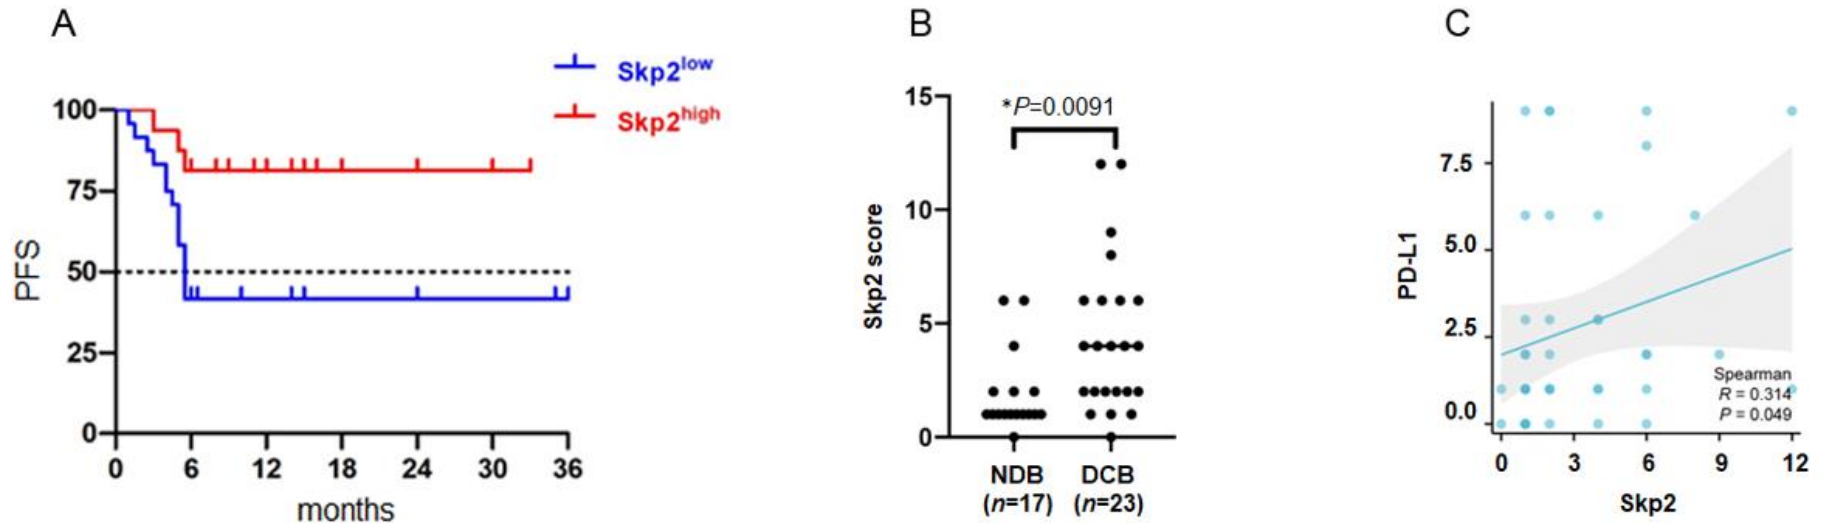

**Supplementary Figure S2. Effect of Skp2 on the therapeutic outcomes of anti-PD-1/PD-L1 immunotherapy in patients with NSCLC. (A)** Progression-free survival analysis of NSCLC patients receiving anti-PD-1/PD-L1 immunotherapy with different Skp2 status. **(B)** The distribution of Skp2 IHC-H score in NSCLC patients with favorable response (DCB) and unfavorable response (NDB) to anti-PD-1/PD-L1 immunotherapy. **(C)** The linear regression analysis of IHC H-score to determine the correlation between Skp2 and PD-L1.

**Figure S3**

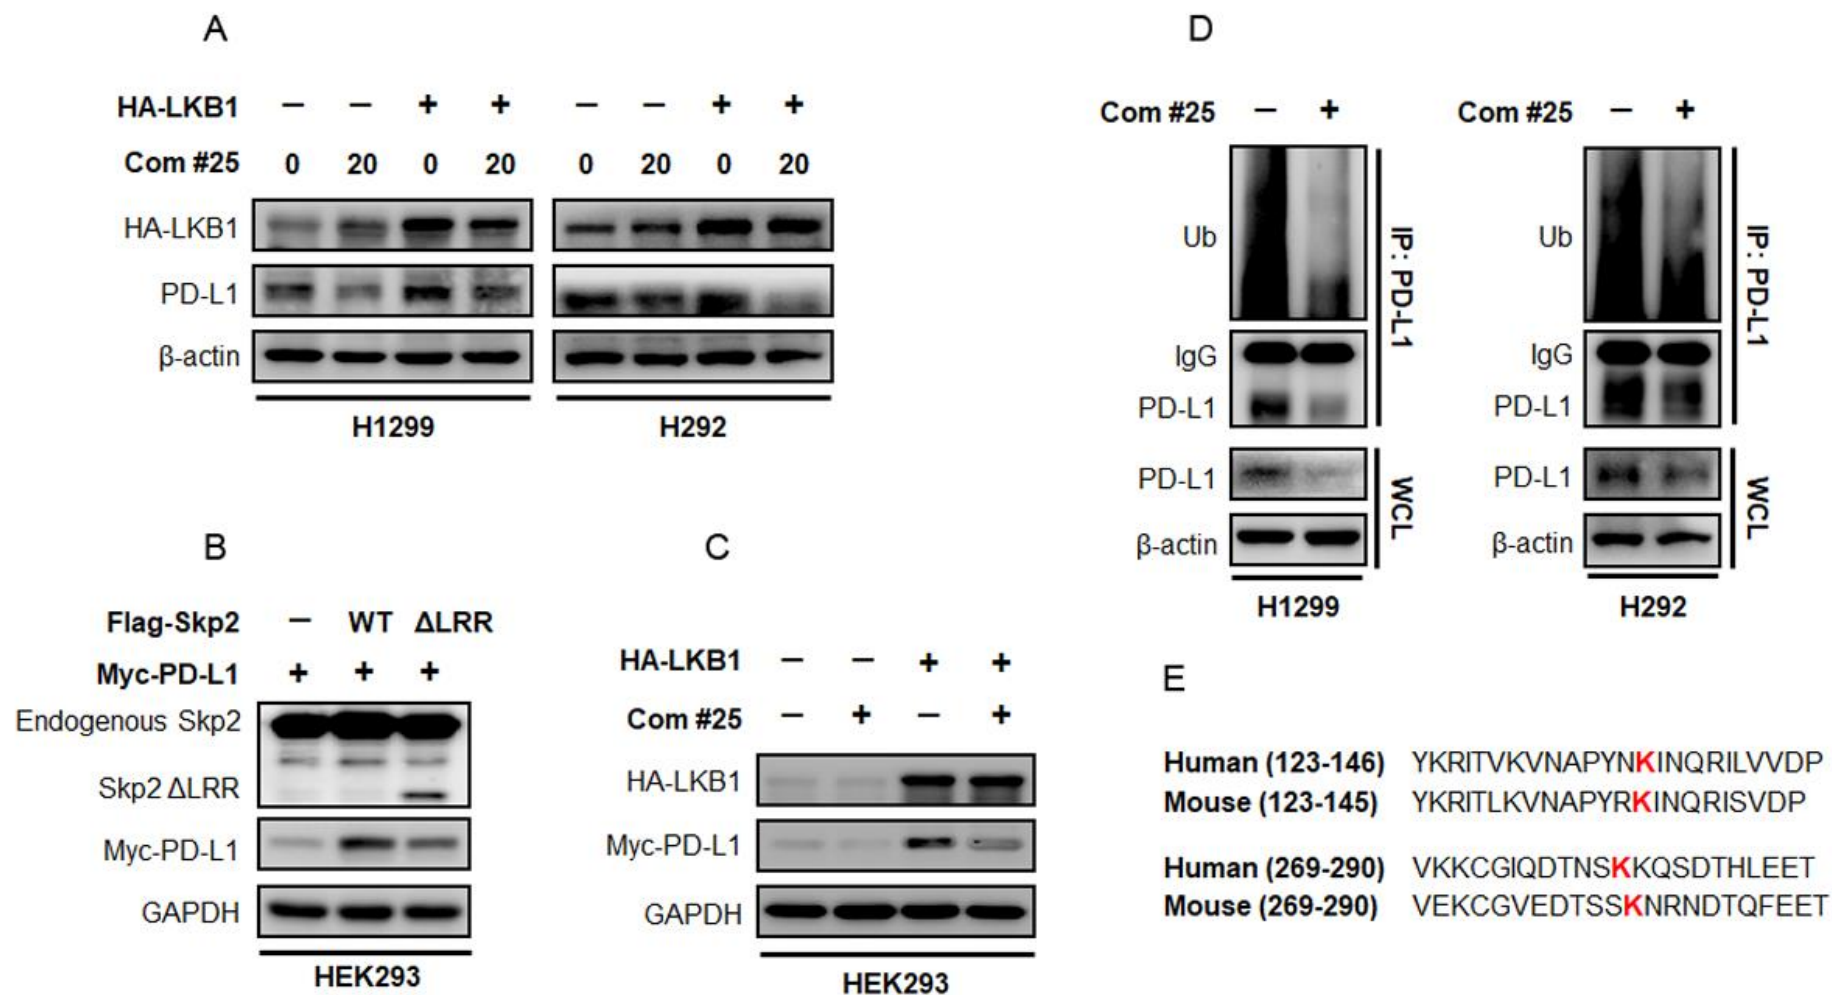

**Supplementary Figure S3. Skp2 promoted PD-L1 protein ubiquitination.** (A) HA-tagged LKB1 was overexpressed in H1299 and H292 cells and the resultant cells were treated with 20  $\mu\text{mol/L}$  compound #25 for 48 h. Expression of LKB1 and PD-L1 was evaluated by Western blot analysis. (B) The Flag-tagged Skp2 WT or  $\Delta\text{LRR}$  mutant along with Myc-tagged PD-L1 were expressed in HEK293 cells. The effect of Skp2 on exogenous PD-L1 protein expression was assessed by immunoblotting. (C) Myc-tagged PD-L1 was stably overexpressed in HEK293 cells. The cells were transfected with HA-LKB1 and treated with or without compound #25 (20  $\mu\text{mol/L}$ ) for 48 h. The effect of compound #25 on LKB1-induced PD-L1 expression was determined by Western blot analysis. (D) Effect of inhibiting Skp2 E3 ligase activity by compound #25 on PD-L1 protein ubiquitination in H1299 and H292 cells. (E) Alignment analysis of conserved lysine residues on human PD-L1 and mouse PD-L1 protein. Potential ubiquitination sites on PD-L1 were highlighted in red.
